# Supplementary material for: Novel Sophoridine Derivatives Bearing Phosphoramide Mustard Moiety Exhibit Potent Antitumor Activities In Vitro and In Vivo
Source: MDPI journal article supplement (doi:10.3390/molecules23081960), 2018-08-06
Supplement: s1 [file s1]

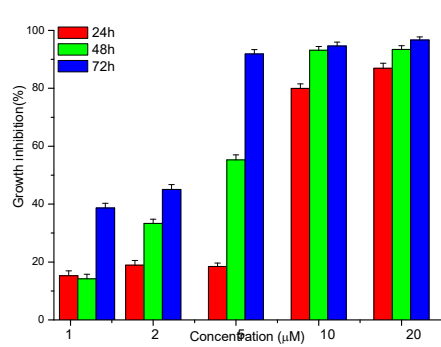

(a)

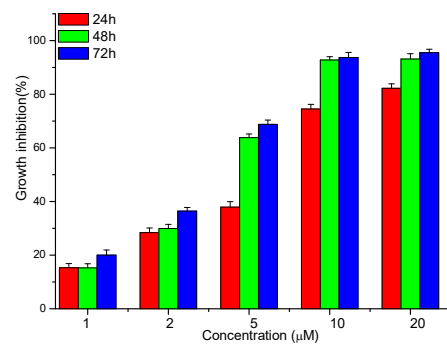

(b)

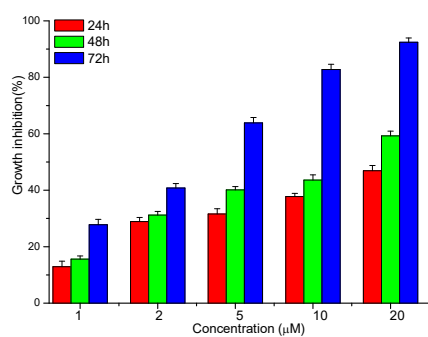

(c)

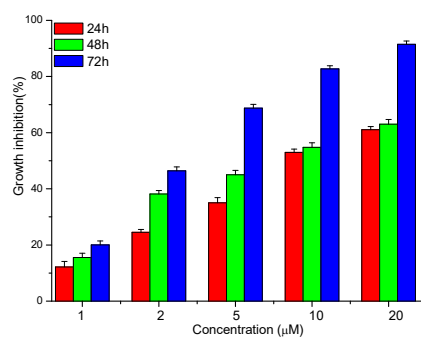

(d)

**Figure S1.** Time-dependent growth inhibition of **7c** and **7d** on H22 and S180 cell lines. Cells were cultured for 24–72h at concentrations of 1–20 μM. (a)**7c**, H22; (b)**7c**, S180; (c) **7d**, H22; (d) **7d**, S180.

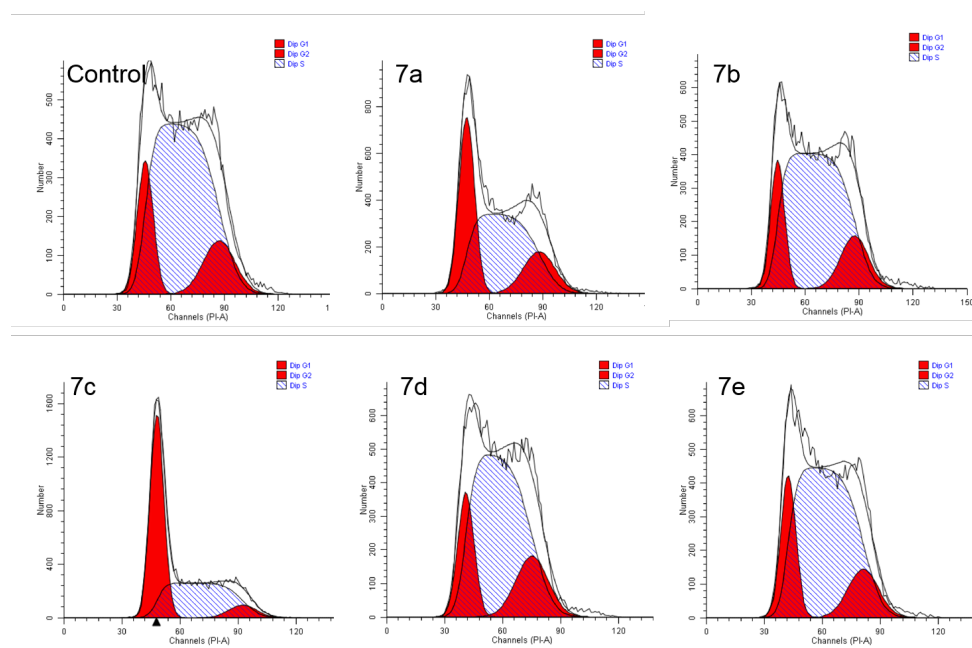

**Figure S2.** Cell cycle inhibition in H22 cell line by treating with compounds **7a–7e** for 48 h.

**Table S1.** Cell cycle analysis by flow cytometry of H22 cells treated with compounds **7a–7e** for 48 h.

| Sample    | Distribution (%) |       |       |
|-----------|------------------|-------|-------|
|           | G1               | S     | G2/M  |
| Control   | 15.32            | 72.42 | 12.26 |
| <b>7a</b> | 32.02            | 52.83 | 15.15 |
| <b>7b</b> | 15.44            | 71.86 | 12.70 |
| <b>7c</b> | 51.22            | 42.48 | 6.30  |
| <b>7d</b> | 16.10            | 68.24 | 15.66 |
| <b>7e</b> | 17.21            | 71.04 | 11.75 |

**Table S2.** Docking statistics of synthesized compounds **7a–7e** against DNA-Top I.

| Compound  | Glide Score | Glide Energy | H-bonding Ligand/ Receptor                                             | $\pi$ - $\pi$ Interaction                        |
|-----------|-------------|--------------|------------------------------------------------------------------------|--------------------------------------------------|
| CPT       | -8.704      | -88.330      | N of quinoline group/ H of ARG364; H of hydroxyl group / O of ASP533   | CPT/TGP11 and DT10 of DNA                        |
| <b>7a</b> | -9.614      | -98.615      | O of carbonyl group / H of TYR426; H of ammonium group / O of GLU356   | Aromatic group of compound/TGP11 of DNA          |
| <b>7b</b> | -9.999      | -108.058     | O of carbonyl group / H of MET428; H of ammonium group / O of LEU356   | Aromatic group of compound/TGP11 of DNA          |
| <b>7c</b> | -8.793      | -104.546     | O of carbonyl group / H of TYR426; Cl of mustard nitrogen / H of DC111 | Aromatic group of compound/TGP11 and DT10 of DNA |
| <b>7d</b> | -8.920      | -110.507     | O of carbonyl group / H of ASN352; Cl of mustard nitrogen / H of DC111 | Aromatic group of compound/TGP11 and DT10 of DNA |
| <b>7e</b> | -9.565      | -93.638      | O of carbonyl group / H of ASN352; H of ammonium group / O of GLU356   | Aromatic group of compound/TGP11 of DNA          |
